# Supplementary material
Source: publisher figshare collection journal article supplement (https://tandf.figshare.com/articles/dataset/_/6019664)
Supplement: Supplementary file 1 [file 1]

Table S1. Logistic regression results for detecting scale-model random intercept variance

|                                              | Log-Odds | Standard | Wald     |       |
|----------------------------------------------|----------|----------|----------|-------|
|                                              | (logits) | Error    | $\chi^2$ | $p$   |
| Intercept                                    | 46.10    | 2.32     | –        | –     |
| Individuals ( $N$ ; 0 = 115)                 | 0.40     | 0.02     | 292.25   | <.001 |
| Occasions ( $n_i$ ; 0 = 30)                  | 2.03     | 0.10     | 389.11   | <.001 |
| SMRI Variance ( $\sigma_{e_i}^2$ ; 0 = –2.7) | 0.01     | <0.01    | 233.48   | <.001 |
| Individuals*Occasions                        | 31.16    | 1.55     | 403.52   | <.001 |
| Individuals*SMRI Variance                    | 0.16     | 0.01     | 186.50   | <.001 |
| Occasions*SMRI Variance                      | 0.68     | 0.04     | 305.96   | <.001 |
| Individuals*Occasions*SMRI Variance          | <0.01    | <0.01    | 86.53    | <.001 |

*Note.* SMRI = scale-model random intercept. The effect of scale-model random intercept variance was non-linear in the logit, which was rectified via natural log transformation. For analysis, (natural log-transformed) scale-model random intercept variance was mean-centered at –2.7 (which represented 0.07 on the untransformed scale; i.e.,  $\exp[-2.7] = 0.07$ ). The number of individuals was mean-centered at 115. The number of repeated occasions was mean-centered at 30. Model fit: Hosmer-Lemeshow  $\chi^2_2 = 0.72$ ,  $p = .698$ ; area under ROC curve (c-statistic) = .999, 95% CI = [.999, .999].
