# Supplementary material
Source: publisher figshare collection journal article supplement (https://tandf.figshare.com/articles/dataset/_/6019664)
Supplement: Supplementary file 2 [file 1]

Table S2. Logistic regression results for predicting scale-model random intercept variance

|                                                   | Log-Odds<br>(logits) | Standard<br>Error | Wald<br>$\chi^2$ | <i>p</i> |
|---------------------------------------------------|----------------------|-------------------|------------------|----------|
| Intercept                                         | 12.94                | 0.50              | –                | –        |
| Individuals ( $N$ ; 0 = 115)                      | 0.18                 | 0.01              | 654.66           | <.001    |
| Occasions ( $n_i$ ; 0 = 30)                       | 0.58                 | 0.02              | 609.74           | <.001    |
| SMRI Variance ( $\sigma_{e_i}^2$ ; 0 = –2.3)      | 8.25                 | 0.34              | 597.78           | <.001    |
| Pseudo- $R^2$ (0 = –1.9)                          | 14.33                | 0.52              | 754.12           | <.001    |
| Individuals*Occasions                             | 0.01                 | <.01              | 422.59           | <.001    |
| Individuals*SMRI Variance                         | 0.06                 | <.01              | 256.72           | <.001    |
| Individuals*Pseudo- $R^2$                         | 0.06                 | <.01              | 258.02           | <.001    |
| Occasions*SMRI Variance                           | 0.20                 | 0.01              | 230.44           | <.001    |
| Occasions*Pseudo- $R^2$                           | 0.44                 | 0.02              | 403.36           | <.001    |
| SMRI Variance*Pseudo- $R^2$                       | 3.25                 | 0.30              | 115.08           | <.001    |
| Individuals*Occasions*SMRI Variance               | <.01                 | <.01              | 40.68            | <.001    |
| Individuals*Occasions*Pseudo- $R^2$               | <.01                 | <.01              | 85.56            | <.001    |
| Individuals*SMRI Variance*Pseudo- $R^2$           | 0.01                 | <.01              | 10.22            | 0.001    |
| Occasions*SMRI Variance*Pseudo- $R^2$             | 0.09                 | 0.02              | 20.10            | <.001    |
| Individuals*Occasions*SMRI Variance*Pseudo- $R^2$ | <.01                 | <.01              | 8.98             | 0.003    |

*Note.* SMRI = scale-model random intercept. Both the effect of scale-model random intercept variance and pseudo- $R^2$  were non-linear in the logit, which were rectified via natural log transformation. For analysis, (natural log-transformed) scale-model random intercept variance was mean-centered at –2.3 and (natural log-transformed) pseudo- $R^2$  was centered at –1.9 (which

represents 0.10 and 0.15 on the untransformed scale, respectively; e.g.,  $\exp[-2.3] = 0.10$ ). The number of individuals was mean-centered at 115. The number of repeated occasions was mean-centered at 30. Model fit: Hosmer-Lemeshow  $\chi^2_6 = 12.71, p = .048$ ; area under ROC curve (c-statistic) = .996, 95% CI = [.996, .997].
